# Supplementary material for: Oncogenic and drug-sensitive RET mutations in human epithelial ovarian cancer
Source: Springer Nature journal article supplement (doi:10.1186/s13046-020-01557-3), 2020-03-23

## Supplementary Figure 1

### PTKs-encoding genes

#### Receptor tyrosine kinases genes (n=60)

AATK ALK AXL CSF1R DDR1 DDR2  
EGFR EPHA1 EPHA2 EPHA3 EPHA4  
EPHA5 EPHA6 EPHA7 EPHA8 EPHA10  
EPHB1 EPHB2 EPHB3 EPHB4 EPHB6  
ERBB2 ERBB3 ERBB4 FGFR1 FGFR2  
FGFR3 FGFR4 FLT1 FLT3 FLT4 IGF1R  
INSR INSRR KDR KIT LTK LMTK2  
LMTK3 MERTK MET MST1R MUSK  
NPR1 NPR2 NTRK1 NTRK2 NTRK3  
PDGFRA PDGFRB PTK7 RET ROR1  
ROR2 RYK STYK1 CTEK TIE1 TYRO3

#### Non-receptor tyrosine kinases genes (n=40)

ABL1 ABL2 BLK BMX BTK CSK FER FES  
FGR FRK FYN HCK ILK IRAK4 ITK JAK1  
JAK2 JAK3 KSR1 LCK LYN MA3K20 MATK  
PKDCC PLK4 PTK2 PTK2B PTK6 SRC  
SRMS SYK TEC TEX14 TNK1 TNK2  
TNNI3K TXK TYK2 YES1 ZAP70

## Supplementary Figure 2

### A

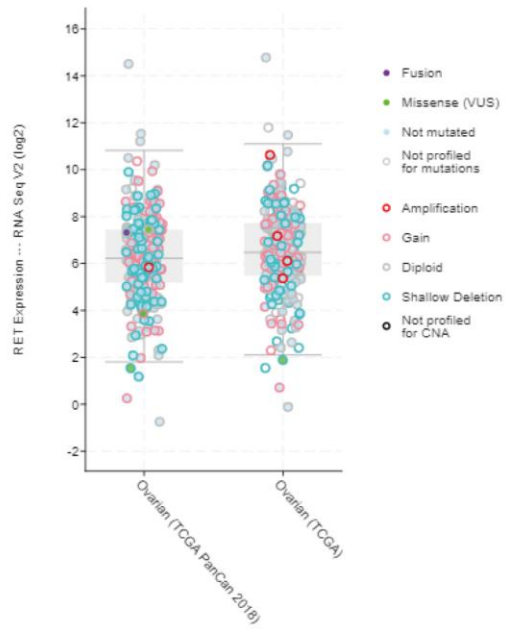

### B

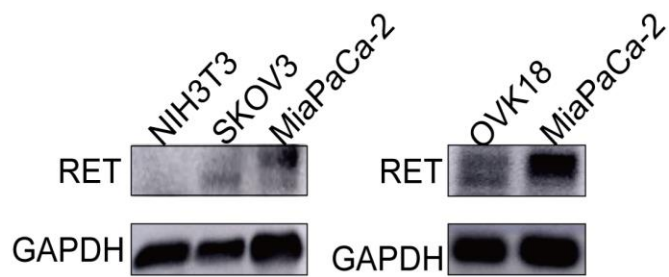

Supplementary Figure 3

**A**

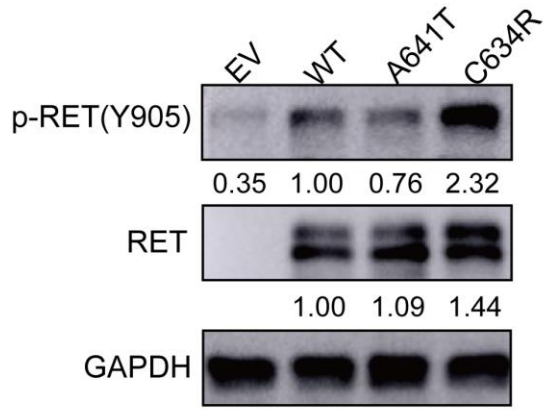

**B**

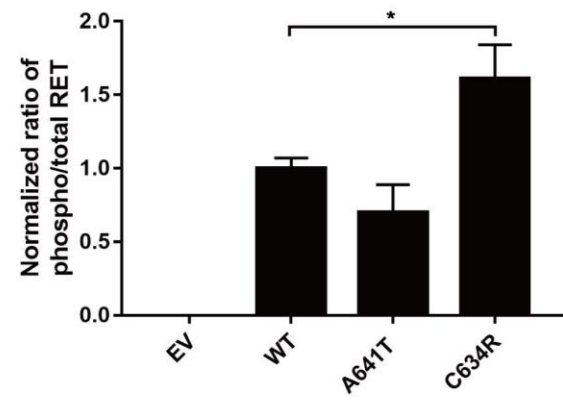

**C**

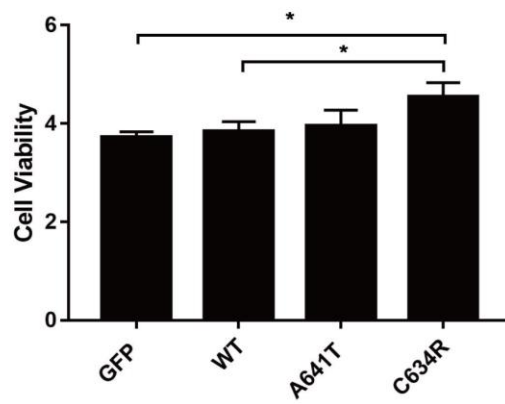

Supplement: MOESM1 [file 17824122]
